# Supplementary material
Source: publisher figshare collection journal article supplement (https://acs.figshare.com/ndownloader/files/5395403)
Supplement: Supplementary file 1 [file 5395403]

data_general 
 
_publ_contact_author 
; 
   Prof. Alceo Macchioni
  Professor of General and Inorganic Chemistry
  Dept. of Chemistry, Biology and Biotechnology
  University of Perugia
  Via Elce di Sotto, 8
  06123 - Perugia (ITALY)

; 
_publ_contact_author_email      alceo.macchioni@unipg.it
 
_publ_requested_journal         
 'JACS'  
 
loop_ 
    _publ_author_name 
    _publ_author_address 
 
  'Alberto Bucci, Gabriel Menendez Rodriguez' 
   'Gianfranco Bellachioma' 
   'Cristiano Zuccaccia, Alceo Macchioni,'
;  Dept. of Chemistry, Biology and Biotechnology
   University of Perugia
   Via Elce di Sotto, 8
   06123 - Perugia (ITALY)
; 
  Albert Poater
;
  Institut de QuimicaComputacional i Catalisi,
  and Departament de Quimica, 
  Universitat de Girona, Campus Montilivi, 
  17071 Girona, Catalonia, Spain
;
  Luigi Cavallo
;
  KAUSTCatalysis Center, Physical Sciences and Engineering Division, 
  King Abdullah University of Science and Technology, 
  Thuwal 23955-6900, Saudi Arabia
;


_publ_section_title 
; 
A Novel Reaction Pathway for Iridium Catalyzed Water Oxidation Driven by CAN
; 
_publ_section_references 
;
  
   Sir97: c. Giacovazzo, J. Appl. Cryst. 32, 115-119 (1999).

   SHELXL-97: G.M. Sheldrick ,University of Goettingen, Germany, 1997. 

   Wingx: L.J. Farrugia, J. Appl. Cryst 32, 837-838 (1999).

;
_publ_section_acknowledgements 
; 
 This work was financially supported by SABIC, 
 Regione Umbria (POR FSE Projects), 
 and COST Action CM1205 (CARISMA). 
;
 
data_2
 
_audit_creation_method
;
CrysAlis RED, Oxford Diffraction Ltd.,
Version 1.171.33.55 (release 05-01-2010 CrysAlis171 .NET)
(compiled Jan  5 2010,16:28:46)
;
_chemical_name_common             ?
_chemical_melting_point           ?
_chemical_formula_moiety          'C20 H24 Cl Ir N3, Cl'
_chemical_formula_sum             'C20 H24 Cl2 Ir N3'
_chemical_formula_weight          569.52
 
loop_
 _atom_type_symbol
 _atom_type_description
 _atom_type_scat_dispersion_real
 _atom_type_scat_dispersion_imag
 _atom_type_scat_source
 'C'  'C'   0.0033   0.0016
 'International Tables Vol C Tables 4.2.6.8 and 6.1.1.4'
 'H'  'H'   0.0000   0.0000
 'International Tables Vol C Tables 4.2.6.8 and 6.1.1.4'
 'N'  'N'   0.0061   0.0033
 'International Tables Vol C Tables 4.2.6.8 and 6.1.1.4'
 'Cl'  'Cl'   0.1484   0.1585
 'International Tables Vol C Tables 4.2.6.8 and 6.1.1.4'
 'Ir'  'Ir'  -1.4442   7.9887
 'International Tables Vol C Tables 4.2.6.8 and 6.1.1.4'
 
_symmetry_cell_setting                  orthorhombic
_symmetry_space_group_name_H-M          'P 21 21 21'
_symmetry_space_group_name_Hall         'P 2ac 2ab'
_symmetry_Int_Tables_number             19
 
loop_
 _symmetry_equiv_pos_as_xyz
 'x, y, z'
 '-x+1/2, -y, z+1/2'
 'x+1/2, -y+1/2, -z'
 '-x, y+1/2, -z+1/2'
 
_cell_length_a                    9.263(4)
_cell_length_b                    13.429(5)
_cell_length_c                    17.935(7)
_cell_angle_alpha                 90.000(0)
_cell_angle_beta                  90.000(0)
_cell_angle_gamma                 90.000(0)
_cell_volume                      2231.0(16)
_cell_formula_units_Z             4
_cell_measurement_temperature     295(2)
_cell_measurement_reflns_used   9755
_cell_measurement_theta_min     3.1554
_cell_measurement_theta_max     29.2932
 
_exptl_crystal_description              prism
_exptl_crystal_colour                   yellow
_exptl_crystal_size_max                 0.25
_exptl_crystal_size_mid                 0.15
_exptl_crystal_size_min                 0.1
_exptl_crystal_density_meas       ?
_exptl_crystal_density_diffrn     1.696
_exptl_crystal_density_method     'not measured'
_exptl_crystal_F_000              1104
_exptl_absorpt_coefficient_mu     6.232
_exptl_absorpt_correction_type            'multi-scan'
_exptl_absorpt_correction_T_min                   0.76609
_exptl_absorpt_correction_T_max                   1.00000
_exptl_absorpt_process_details
;
CrysAlis RED, Oxford Diffraction Ltd.,
Version 1.171.33.55 (release 05-01-2010 CrysAlis171 .NET)
(compiled Jan  5 2010,16:28:46)
Empirical absorption correction using spherical harmonics,
 implemented in SCALE3 ABSPACK scaling algorithm.
;
 
_exptl_special_details
;
 ?
;
 
_diffrn_ambient_temperature       295(2)
_diffrn_radiation_wavelength      0.71069
_diffrn_radiation_type            MoK\a
_diffrn_radiation_source          'Enhance (Mo) X-ray Source'
_diffrn_radiation_monochromator   graphite
_diffrn_measurement_device_type   'Xcalibur, Sapphire2, large Be window'
_diffrn_measurement_method        '\w scans'
_diffrn_detector_area_resol_mean    8.2492
_diffrn_reflns_number             21899
_diffrn_reflns_av_R_equivalents   0.0512
_diffrn_reflns_av_sigmaI/netI     0.0733
_diffrn_reflns_limit_h_min        -12
_diffrn_reflns_limit_h_max        12
_diffrn_reflns_limit_k_min        -18
_diffrn_reflns_limit_k_max        17
_diffrn_reflns_limit_l_min        -24
_diffrn_reflns_limit_l_max        24
_diffrn_reflns_theta_min          3.16
_diffrn_reflns_theta_max          29.36
_reflns_number_total              5833
_reflns_number_gt                 4470
_reflns_threshold_expression      >2sigma(I)
 
_computing_data_collection
;
CrysAlis CCD, Oxford Diffraction Ltd.,
Version 1.171.33.55 (release 05-01-2010 CrysAlis171 .NET)
(compiled Jan  5 2010,16:28:46)
;
_computing_cell_refinement
;
CrysAlis RED, Oxford Diffraction Ltd.,
Version 1.171.33.55 (release 05-01-2010 CrysAlis171 .NET)
(compiled Jan  5 2010,16:28:46)
;
_computing_data_reduction
;
CrysAlis RED, Oxford Diffraction Ltd.,
Version 1.171.33.55 (release 05-01-2010 CrysAlis171 .NET)
(compiled Jan  5 2010,16:28:46)
;
_computing_structure_solution     'SHELXS-86 (Sheldrick, 1986)'
_computing_structure_refinement   'SHELXL-97 (Sheldrick, 1997)'
_computing_publication_material   'WinGX publication routines (Farrugia, 1999)'
 
_refine_special_details
;
 Refinement of F^2^ against ALL reflections.  The weighted R-factor wR and
 goodness of fit S are based on F^2^, conventional R-factors R are based
 on F, with F set to zero for negative F^2^. The threshold expression of
 F^2^ > 2sigma(F^2^) is used only for calculating R-factors(gt) etc. and is
 not relevant to the choice of reflections for refinement.  R-factors based
 on F^2^ are statistically about twice as large as those based on F, and R-
 factors based on ALL data will be even larger.
;
 
_refine_ls_structure_factor_coef  Fsqd
_refine_ls_matrix_type            full
_refine_ls_weighting_scheme       calc
_refine_ls_weighting_details
 'calc w=1/[\s^2^(Fo^2^)+(0.0788P)^2^+21.0753P] where P=(Fo^2^+2Fc^2^)/3'
_atom_sites_solution_primary      direct
_atom_sites_solution_secondary    difmap
_atom_sites_solution_hydrogens    geom
_refine_ls_hydrogen_treatment     constr
_refine_ls_extinction_method      none
_refine_ls_extinction_coef        ?
_refine_ls_abs_structure_details
 'Flack H D (1983), Acta Cryst. A39, 876-881'
_refine_ls_abs_structure_Flack    0.06(2)
_refine_ls_number_reflns          5833
_refine_ls_number_parameters      233
_refine_ls_number_restraints      8
_refine_ls_R_factor_all           0.0879
_refine_ls_R_factor_gt            0.0581
_refine_ls_wR_factor_ref          0.1707
_refine_ls_wR_factor_gt           0.1644
_refine_ls_goodness_of_fit_ref    1.045
_refine_ls_restrained_S_all       1.051
_refine_ls_shift/su_max           0.046
_refine_ls_shift/su_mean          0.005
 
loop_
 _atom_site_label
 _atom_site_type_symbol
 _atom_site_fract_x
 _atom_site_fract_y
 _atom_site_fract_z
 _atom_site_U_iso_or_equiv
 _atom_site_adp_type
 _atom_site_occupancy
 _atom_site_symmetry_multiplicity
 _atom_site_calc_flag
 _atom_site_refinement_flags
 _atom_site_disorder_assembly
 _atom_site_disorder_group
C1 C 0.2469(18) 0.0220(12) 0.0898(11) 0.050(4) Uani 1 1 d . A 1
H1 H 0.3368 0.0314 0.1118 0.04(2) Uiso 1 1 calc R A 1
C2 C 0.239(2) -0.0212(17) 0.0193(11) 0.068(6) Uani 1 1 d . A 1
H2 H 0.3221 -0.0378 -0.0072 0.04(2) Uiso 1 1 calc R A 1
C3 C 0.104(2) -0.038(2) -0.0095(11) 0.078(7) Uani 1 1 d . A 1
H3 H 0.0951 -0.0698 -0.0554 0.04(2) Uiso 1 1 calc R A 1
C4 C -0.0151(18) -0.0095(15) 0.0283(10) 0.055(4) Uani 1 1 d . A 1
H4 H -0.1059 -0.0191 0.0074 0.04(2) Uiso 1 1 calc R A 1
C5 C -0.0027(16) 0.0333(11) 0.0968(11) 0.045(4) Uani 1 1 d . A 1
C6 C -0.1422(15) 0.0550(9) 0.2151(9) 0.037(3) Uani 1 1 d . A 1
C7 C -0.046(2) 0.0638(12) 0.3344(7) 0.045(4) Uani 1 1 d . A 1
H7 H 0.0345 0.0737 0.3647 0.05(2) Uiso 1 1 calc R A 1
C8 C -0.177(2) 0.0419(14) 0.3666(10) 0.063(6) Uani 1 1 d . A 1
H8 H -0.1869 0.0374 0.4181 0.05(2) Uiso 1 1 calc R A 1
C9 C -0.294(2) 0.0265(15) 0.3181(14) 0.063(5) Uani 1 1 d . A 1
H9 H -0.3841 0.0093 0.3374 0.05(2) Uiso 1 1 calc R A 1
C10 C -0.2768(19) 0.0367(12) 0.2435(11) 0.051(5) Uani 1 1 d . A 1
H10 H -0.3558 0.0313 0.2118 0.05(2) Uiso 1 1 calc R A 1
C11 C 0.0827(16) 0.2889(11) 0.1716(8) 0.043(4) Uani 1 1 d D A 1
C12 C 0.063(2) 0.2907(8) 0.2545(7) 0.060 Uani 1 1 d D A 1
C13 C 0.1893(18) 0.2797(6) 0.2836(7) 0.063 Uani 1 1 d D A 1
C14 C 0.3020(17) 0.2717(11) 0.2270(9) 0.052(4) Uani 1 1 d D A 1
C15 C 0.236(2) 0.2795(15) 0.1550(12) 0.102(10) Uani 1 1 d D A 1
C16 C -0.039(3) 0.3078(15) 0.1225(15) 0.083(7) Uani 1 1 d . A 1
H16A H -0.1252 0.2813 0.1445 0.068(12) Uiso 1 1 calc R A 1
H16B H -0.0222 0.2763 0.0753 0.068(12) Uiso 1 1 calc R A 1
H16C H -0.0495 0.3782 0.1154 0.068(12) Uiso 1 1 calc R A 1
C17 C -0.079(2) 0.3030(19) 0.2924(14) 0.088(8) Uani 1 1 d . A 1
H17A H -0.0656 0.3001 0.3454 0.068(12) Uiso 1 1 calc R A 1
H17B H -0.1428 0.2506 0.2770 0.068(12) Uiso 1 1 calc R A 1
H17C H -0.1199 0.3662 0.2790 0.068(12) Uiso 1 1 calc R A 1
C18 C 0.250(4) 0.2818(16) 0.3644(12) 0.100(10) Uani 1 1 d . A 1
H18A H 0.2948 0.3450 0.3736 0.068(12) Uiso 1 1 calc R A 1
H18B H 0.3198 0.2296 0.3703 0.068(12) Uiso 1 1 calc R A 1
H18C H 0.1723 0.2721 0.3991 0.068(12) Uiso 1 1 calc R A 1
C19 C 0.470(2) 0.2599(15) 0.229(3) 0.152(19) Uani 1 1 d . A 1
H19A H 0.5123 0.3195 0.2491 0.115(12) Uiso 1 1 calc R A 1
H19B H 0.5054 0.2485 0.1798 0.115(12) Uiso 1 1 calc R A 1
H19C H 0.4946 0.2044 0.2605 0.115(12) Uiso 1 1 calc R A 1
C20 C 0.299(4) 0.265(2) 0.0806(16) 0.160(18) Uani 1 1 d D A 1
H20A H 0.2241 0.2689 0.0437 0.115(12) Uiso 1 1 calc R A 1
H20B H 0.3442 0.2008 0.0782 0.115(12) Uiso 1 1 calc R A 1
H20C H 0.3695 0.3159 0.0714 0.115(12) Uiso 1 1 calc R A 1
N1 N 0.1280(13) 0.0501(9) 0.1266(6) 0.038(3) Uani 1 1 d . A 1
N2 N -0.1233(15) 0.0596(11) 0.1316(6) 0.048(3) Uani 1 1 d . A 1
H2A H -0.1946 0.0803 0.1051 0.04(4) Uiso 1 1 calc R A 1
N3 N -0.0316(13) 0.0715(10) 0.2587(5) 0.034(3) Uani 1 1 d . A 1
Cl1 Cl 0.3002(4) 0.0286(3) 0.2781(3) 0.0510(9) Uani 1 1 d . A 1
Cl2 Cl 0.5991(5) 0.0297(5) 0.0496(3) 0.0781(17) Uani 1 1 d . B 1
Ir1 Ir 0.15194(6) 0.14990(4) 0.21740(3) 0.03666(15) Uani 1 1 d . A 1
 
loop_
 _atom_site_aniso_label
 _atom_site_aniso_U_11
 _atom_site_aniso_U_22
 _atom_site_aniso_U_33
 _atom_site_aniso_U_23
 _atom_site_aniso_U_13
 _atom_site_aniso_U_12
C1 0.035(8) 0.043(9) 0.074(12) 0.002(8) 0.021(8) -0.001(7)
C2 0.042(10) 0.099(17) 0.062(12) -0.032(11) 0.021(9) 0.010(10)
C3 0.071(14) 0.124(19) 0.039(10) -0.018(11) 0.011(9) 0.026(13)
C4 0.034(8) 0.085(13) 0.046(10) -0.016(9) -0.001(7) -0.006(8)
C5 0.035(8) 0.029(7) 0.072(12) -0.003(7) -0.009(7) 0.000(6)
C6 0.032(6) 0.036(6) 0.044(7) -0.008(6) -0.013(8) -0.002(6)
C7 0.077(12) 0.052(9) 0.006(6) -0.003(6) 0.005(6) -0.006(9)
C8 0.073(14) 0.066(11) 0.050(10) 0.016(8) 0.030(10) 0.020(10)
C9 0.047(10) 0.063(13) 0.081(15) 0.004(11) 0.007(10) -0.005(9)
C10 0.043(9) 0.034(8) 0.076(14) -0.023(8) -0.007(8) 0.010(7)
C11 0.042(9) 0.048(9) 0.040(9) 0.002(7) 0.010(6) -0.007(7)
C12 0.083(11) 0.023(9) 0.068(12) 0.012(6) -0.029(8) -0.016(5)
C13 0.094(11) 0.043(5) 0.061(8)  0.025(8) -0.030(12) -0.028(6)
C14 0.073(11) 0.033(7) 0.049(10) 0.003(7) -0.019(9) -0.018(7)
C15 0.096(18) 0.067(15) 0.14(3) 0.003(16) 0.055(19) -0.037(13)
C16 0.088(16) 0.038(10) 0.12(2) -0.002(11) -0.028(15) 0.002(11)
C17 0.081(15) 0.111(18) 0.072(15) -0.014(13) 0.011(12) 0.050(13)
C18 0.20(3) 0.050(12) 0.052(13) -0.007(10) -0.051(16) -0.005(14)
C19 0.071(14) 0.035(10) 0.35(5) -0.03(2) -0.11(3) 0.016(10)
C20 0.19(4) 0.074(17) 0.22(4) 0.09(2) 0.08(3) 0.00(2)
N1 0.043(7) 0.043(6) 0.027(5) 0.015(5) -0.014(5) 0.003(5)
N2 0.049(8) 0.078(9) 0.018(5) 0.020(6) -0.002(5) 0.004(7)
N3 0.039(7) 0.052(8) 0.011(5) -0.001(4) -0.007(4) 0.003(5)
Cl1 0.052(2) 0.0435(18) 0.057(2) 0.007(2) -0.012(2) 0.0018(14)
Cl2 0.034(2) 0.149(5) 0.051(3) 0.009(3) -0.0057(18) 0.001(3)
Ir1 0.0402(2) 0.0334(2) 0.0364(2) 0.0011(3) -0.0074(3) -0.0009(2)
 
_geom_special_details
;
 All esds (except the esd in the dihedral angle between two l.s. planes)
 are estimated using the full covariance matrix.  The cell esds are taken
 into account individually in the estimation of esds in distances, angles
 and torsion angles; correlations between esds in cell parameters are only
 used when they are defined by crystal symmetry.  An approximate (isotropic)
 treatment of cell esds is used for estimating esds involving l.s. planes.
;
 
loop_
 _geom_bond_atom_site_label_1
 _geom_bond_atom_site_label_2
 _geom_bond_distance
 _geom_bond_site_symmetry_2
 _geom_bond_publ_flag
C1 N1 1.34(2) . ?
C1 C2 1.39(3) . ?
C2 C3 1.37(3) . ?
C3 C4 1.35(2) . ?
C4 C5 1.36(2) . ?
C5 N2 1.33(2) . ?
C5 N1 1.343(19) . ?
C6 N3 1.308(17) . ?
C6 C10 1.37(2) . ?
C6 N2 1.510(19) . ?
C7 C8 1.37(2) . ?
C7 N3 1.368(17) . ?
C8 C9 1.41(3) . ?
C9 C10 1.36(3) . ?
C11 C16 1.45(3) . ?
C11 C15 1.458(16) . ?
C11 C12 1.497(14) . ?
C11 Ir1 2.138(15) . ?
C12 C13 1.286(16) . ?
C12 C17 1.49(3) . ?
C12 Ir1 2.165(13) . ?
C13 C14 1.459(16) . ?
C13 C18 1.55(2) . ?
C13 Ir1 2.136(10) . ?
C14 C15 1.432(18) . ?
C14 C19 1.56(3) . ?
C14 Ir1 2.153(14) . ?
C15 C20 1.467(18) . ?
C15 Ir1 2.211(19) . ?
N1 Ir1 2.121(12) . ?
N3 Ir1 2.133(12) . ?
Cl1 Ir1 2.392(4) . ?

 
loop_
 _geom_angle_atom_site_label_1
 _geom_angle_atom_site_label_2
 _geom_angle_atom_site_label_3
 _geom_angle
 _geom_angle_site_symmetry_1
 _geom_angle_site_symmetry_3
 _geom_angle_publ_flag
N1 C1 C2 121.5(17) . . ?
C3 C2 C1 117.3(16) . . ?
C4 C3 C2 120.6(18) . . ?
C3 C4 C5 120.2(16) . . ?
N2 C5 N1 121.9(16) . . ?
N2 C5 C4 117.7(14) . . ?
N1 C5 C4 120.4(15) . . ?
N3 C6 C10 121.5(16) . . ?
N3 C6 N2 119.7(13) . . ?
C10 C6 N2 118.8(14) . . ?
C8 C7 N3 121.2(17) . . ?
C7 C8 C9 117.0(16) . . ?
C10 C9 C8 120.1(19) . . ?
C9 C10 C6 119.6(19) . . ?
C16 C11 C15 130.4(18) . . ?
C16 C11 C12 120.4(17) . . ?
C15 C11 C12 108.7(16) . . ?
C16 C11 Ir1 128.2(12) . . ?
C15 C11 Ir1 73.2(10) . . ?
C12 C11 Ir1 70.6(8) . . ?
C13 C12 C17 129.0(15) . . ?
C13 C12 C11 107.0(14) . . ?
C17 C12 C11 124.0(19) . . ?
C13 C12 Ir1 71.4(8) . . ?
C17 C12 Ir1 124.8(12) . . ?
C11 C12 Ir1 68.7(7) . . ?
C12 C13 C14 112.0(12) . . ?
C12 C13 C18 134.7(16) . . ?
C14 C13 C18 113.1(18) . . ?
C12 C13 Ir1 73.8(8) . . ?
C14 C13 Ir1 70.7(6) . . ?
C18 C13 Ir1 126.3(10) . . ?
C15 C14 C13 108.5(14) . . ?
C15 C14 C19 117(2) . . ?
C13 C14 C19 134(2) . . ?
C15 C14 Ir1 73.1(10) . . ?
C13 C14 Ir1 69.5(7) . . ?
C19 C14 Ir1 124.5(11) . . ?
C14 C15 C11 103.7(16) . . ?
C14 C15 C20 130(2) . . ?
C11 C15 C20 126(2) . . ?
C14 C15 Ir1 68.7(10) . . ?
C11 C15 Ir1 67.7(9) . . ?
C20 C15 Ir1 119.7(16) . . ?
C1 N1 C5 119.9(14) . . ?
C1 N1 Ir1 118.1(11) . . ?
C5 N1 Ir1 120.4(11) . . ?
C5 N2 C6 123.6(13) . . ?
C6 N3 C7 120.3(14) . . ?
C6 N3 Ir1 120.0(9) . . ?
C7 N3 Ir1 117.3(10) . . ?
N1 Ir1 N3 82.6(4) . . ?
N1 Ir1 C13 163.5(4) . . ?
N3 Ir1 C13 109.8(4) . . ?
N1 Ir1 C11 103.0(5) . . ?
N3 Ir1 C11 109.0(5) . . ?
C13 Ir1 C11 63.3(6) . . ?
N1 Ir1 C14 127.5(5) . . ?
N3 Ir1 C14 149.5(5) . . ?
C13 Ir1 C14 39.8(4) . . ?
C11 Ir1 C14 64.0(6) . . ?
N1 Ir1 C12 138.4(6) . . ?
N3 Ir1 C12 91.3(5) . . ?
C13 Ir1 C12 34.8(4) . . ?
C11 Ir1 C12 40.7(4) . . ?
C14 Ir1 C12 63.7(6) . . ?
N1 Ir1 C15 98.3(6) . . ?
N3 Ir1 C15 147.8(6) . . ?
C13 Ir1 C15 65.3(6) . . ?
C11 Ir1 C15 39.1(5) . . ?
C14 Ir1 C15 38.3(5) . . ?
C12 Ir1 C15 66.5(6) . . ?
N1 Ir1 Cl1 88.8(3) . . ?
N3 Ir1 Cl1 87.9(3) . . ?
C13 Ir1 Cl1 102.1(4) . . ?
C11 Ir1 Cl1 160.3(4) . . ?
C14 Ir1 Cl1 96.3(4) . . ?
C12 Ir1 Cl1 132.2(5) . . ?
C15 Ir1 Cl1 124.3(5) . . ?
 
_diffrn_measured_fraction_theta_max    0.992
_diffrn_reflns_theta_full              29.36
_diffrn_measured_fraction_theta_full   0.992
_refine_diff_density_max    0.557
_refine_diff_density_min   -0.462
_refine_diff_density_rms    0.230
